# Supplementary material for: Roll‐Coated Fabrication of Fullerene‐Free Organic Solar Cells with Improved Stability
Source: PubMed Central journal article supplement (PMC5115398; doi:10.1002/advs.201500096), 2015-04-28
Supplement: ADVS-2-0k-s001.pdf [file ADVS-2-0k-s001.pdf]

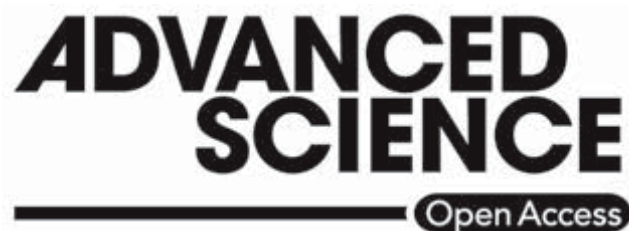

## Supporting Information

for *Adv. Sci.*, DOI: 10.1002/advs.201500096

Roll-Coated Fabrication of Fullerene-Free Organic Solar Cells  
with Improved Stability

*Pei Cheng, Huitao Bai, Natalia K. Zawacka, Thomas R.  
Andersen, Wenqing Liu, Eva Bundgaard, Mikkel Jørgensen,  
Hongzheng Chen, Frederik C. Krebs,\* and Xiaowei Zhan\**

## Supporting Information for

**Roll-Coated Fabrication of Fullerene-Free Organic Solar Cells with Improved Stability**

By Pei Cheng, Huitao Bai, Natalia K. Zawacka, Thomas R. Andersen, Wenqing Liu, Eva Bundgaard, Mikkel Jørgensen, Hongzheng Chen, Frederik C. Krebs\* and Xiaowei Zhan\*

**1. Experimental details****1.1 Materials**

Unless stated otherwise, solvents and chemicals were obtained commercially and were used without further purification. PBDTTT-C-T<sup>[1]</sup> was purchased from Solamer Materials Inc, and DC-IDT2T<sup>[2]</sup> was synthesized according to our previous report. Chlorobenzene (CB), dichlorobenzene (DCB), chloroform (CF) and o-xylene were obtained from J&K Chemical Inc. The polyethylene terephthalate (PET) substrate was Melinex ST506 obtained from Dupont–Teijin.<sup>[3]</sup> The PET/silver (Ag) substrates were prepared according to the literature procedures.<sup>[4]</sup> The metal grid had a finger pattern. Two types of highly conductive poly(3,4-ethylenedioxythiophene): poly(styrenesulfonate) (PEDOT: PSS) were employed. Clevios PH1000 from Heraeus was used on the bottom Ag diluted with isopropyl alcohol (IPA) in the ratio 10:3 (w/w). Orgacon EL-P5010 was used as top PEDOT: PSS diluted with IPA in a 2:1 (w/w) ratio. Zinc oxide (ZnO) nanoparticles in acetone with a concentration of 55 mg ml<sup>-1</sup> were employed for the electron transport layer. The silver electrodes were printed using a flexographic printing silver paste (bottom: PFI-722 from PChem Associates, top: 5025 from Dupont). The front PEDOT:PSS electrode had a sheet resistivity of 60–90  $\Omega \square^{-1}$ , and the substrate with metal grid had a sheet resistivity of 10  $\Omega \square^{-1}$ . The sheet resistivity of the back PEDOT:PSS electrode was 60  $\Omega \square^{-1}$  on its own and the sheet resistivity of the top silver electrode was 0.1  $\Omega \square^{-1}$ . The PET substrate with Ag grid, PEDOT:PSS layer and ZnO layer

had the maximum transmittance of 74.8% at 436 nm, and the transmittance at 550 nm was 70.7%.

## 1.2 Characterization of flexible solar cells.

Solar cells were measured with a Keithley 2400 source meter under a KHS 575 solar simulator with an AM 1.5G  $100 \text{ mW cm}^{-2}$  intensity. The EQE spectrum was measured using a Solar Cell Spectral Response Measurement System QEX10. The Light beam induced current (LBIC) experiments were carried out using a custom made setup with 405 nm laser diode (5 mW output power,  $100 \text{ }\mu\text{m}$  spot size  $\approx 65 \text{ W cm}^{-2}$ , ThorLabs)<sup>[5]</sup> mounted on a computer controlled XY-stage and focused to a spot size of  $<100 \text{ }\mu\text{m}$ . The short circuit current from the device under study was measured using a computer controlled source measure unit (SMU, a Keithley 2400 instrument). A custom written computer program was used to scan the solar cell devices in a raster pattern in  $200 \text{ }\mu\text{m}$  steps in the X and the Y directions, logging the coordinates and measured current. The results were then converted to yellow/blue colored bitmaps in 255 different hues with another custom written program. Bright yellow represents the highest absolute current extracted while blue represents the lowest current. Current profiles along selected directions were taken from these maps to visualize the relative differences in different regions. The nanoscale morphology of blend film was observed using a Veeco Nanoscopy V atomic force microscopy (AFM) in tapping mode. Optical microscopy images were observed using an Olympus BX51 optical microscope. Stability test of solar cells was carried out under continuous illumination of a KHS 575 solar simulator with an AM 1.5G  $100 \text{ mW cm}^{-2}$  intensity, and the  $J$ - $V$  was measured using a Keithley 2400 source meter every 5 min in 180 h. The devices for stability test, optical microscope and LBIC measurements were sealed by cover films (2 glass slides with a UV curable epoxy resin) and exposed under the solar simulator (AM1.5G,  $1000 \text{ W m}^{-2}$ ,  $75 \pm 5^\circ \text{ C}$ ,  $40 \pm 10\%$  relative humidity) for 180 h. These tests were carried out in winter and inside room.

## 2. Details of device optimization

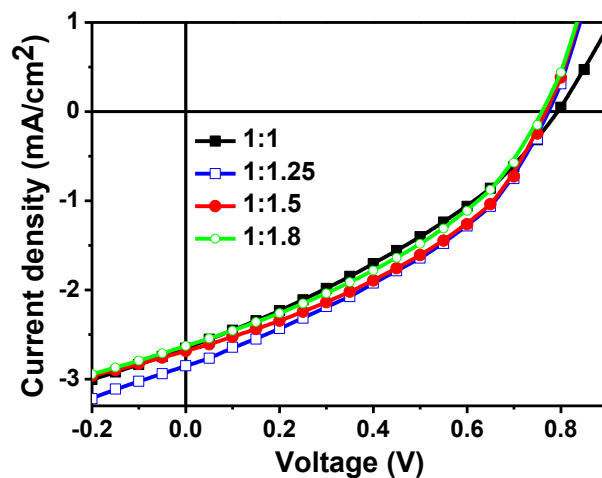

**Figure S1.**  $J$ - $V$  curves of devices with the structure PET/Ag/PEDOT: PSS PH1000/ZnO/PBDTTT-C-T: DC-IDT2T/PEDOT: PSS 5010/Ag with different D/A ratio under the illumination of an AM 1.5G solar simulator,  $100 \text{ mW cm}^{-2}$ .

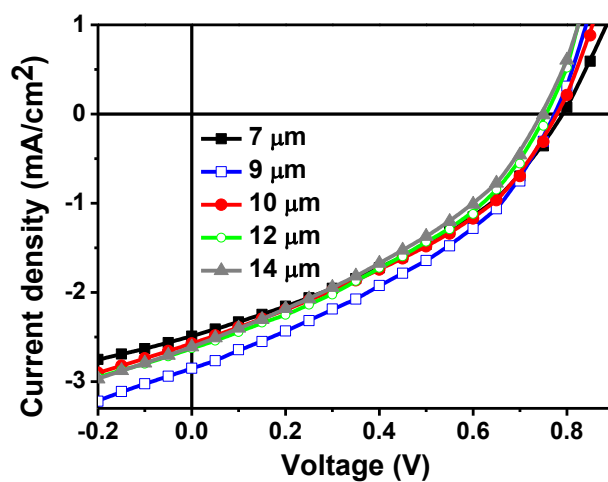

**Figure S2.**  $J$ - $V$  curves of devices with the structure PET/Ag/PEDOT: PSS PH1000/ZnO/PBDTTT-C-T: DC-IDT2T/PEDOT: PSS 5010/Ag with different wet thicknesses of active layer under the illumination of an AM 1.5G solar simulator,  $100 \text{ mW cm}^{-2}$ .

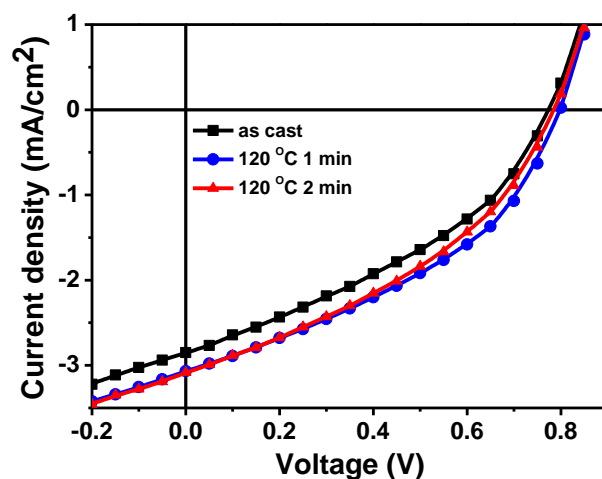

**Figure S3.**  $J$ - $V$  curves of devices with the structure PET/Ag/PEDOT: PSS PH1000/ZnO/PBDTTT-C-T: DC-IDT2T/PEDOT: PSS 5010/Ag with different thermal annealing time under the illumination of an AM 1.5G solar simulator,  $100 \text{ mW cm}^{-2}$ .

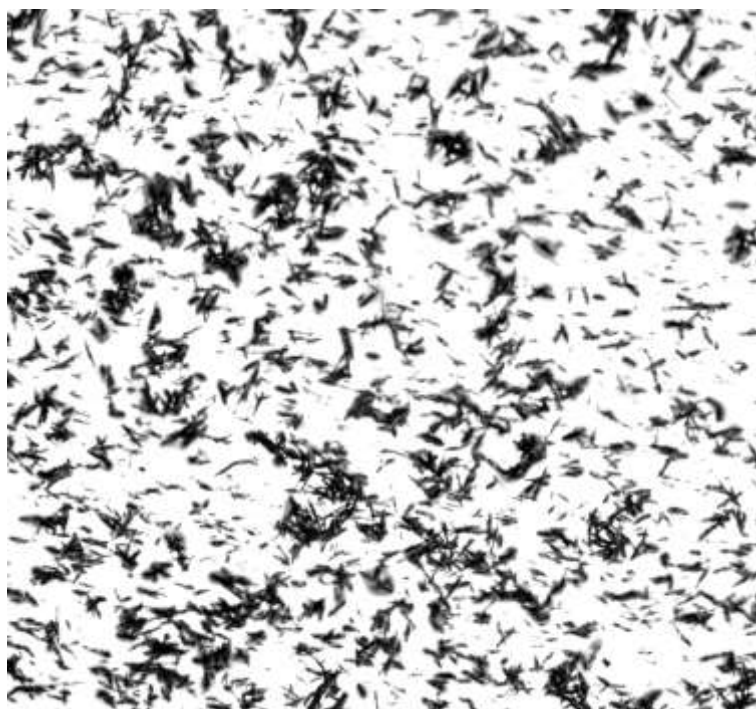

**Figure S4.** Optical microscope image of PBDTTT-C-T: DC-IDT2T films roll-coated on PET/Ag/PEDOT: PSS PH1000/ZnO substrates with *o*-xylene solvent. The scan size is  $800 \mu\text{m} \times 800 \mu\text{m}$ .

**Table S1.** Average and best device data based on PBDTTT-C-T: DC-IDT2T films under different device conditions

| Solvent  | D/A ratio | Wet thickness of active layer ( $\mu\text{m}$ ) | Thermal annealing | $V_{oc}$ (V) | $J_{sc}$ (mA $\text{cm}^{-2}$ ) | FF (%) | PCE (%) |       |
|----------|-----------|-------------------------------------------------|-------------------|--------------|---------------------------------|--------|---------|-------|
|          |           |                                                 |                   |              |                                 |        | average | best  |
| CF       | 1:1.25    | 9                                               |                   | 0.8253       | 2.089                           | 37.23  | 0.642   | 0.674 |
| o-xylene | 1:1.25    | 9                                               |                   | 0.5075       | 0.502                           | 27.44  | 0.070   | 0.075 |
| DCB      | 1:1.25    | 9                                               |                   | 0.7836       | 1.598                           | 31.78  | 0.398   | 0.427 |
| CB       | 1:1       | 9                                               |                   | 0.7933       | 2.652                           | 33.44  | 0.704   | 0.732 |
| CB       | 1:1.25    | 7                                               |                   | 0.7914       | 2.475                           | 37.11  | 0.727   | 0.758 |
| CB       | 1:1.25    | 9                                               |                   | 0.7748       | 2.847                           | 37.22  | 0.821   | 0.867 |
| CB       | 1:1.25    | 9                                               | 120 °C 1 min      | 0.7982       | 3.086                           | 40.11  | 0.988   | 1.019 |
| CB       | 1:1.25    | 9                                               | 120 °C 2 min      | 0.7852       | 3.102                           | 37.98  | 0.925   | 0.965 |
| CB       | 1:1.25    | 10                                              |                   | 0.7798       | 2.580                           | 37.02  | 0.745   | 0.790 |
| CB       | 1:1.25    | 12                                              |                   | 0.7602       | 2.631                           | 36.16  | 0.723   | 0.746 |
| CB       | 1:1.25    | 14                                              |                   | 0.7508       | 2.612                           | 35.15  | 0.689   | 0.701 |
| CB       | 1:1.5     | 9                                               |                   | 0.7696       | 2.660                           | 38.93  | 0.797   | 0.832 |
| CB       | 1:1.8     | 9                                               |                   | 0.7628       | 2.624                           | 37.07  | 0.742   | 0.789 |

**Table S2.** Average and best device data based on PBDTTT-C-T: PC<sub>71</sub>BM films under different device conditions

| Solvent  | DIO<br>(v/v %) | $V_{oc}$ (V) | $J_{sc}$ (mA<br>$cm^{-2}$ ) | calculated $J_{sc}$<br>(mA $cm^{-2}$ ) | FF (%) | PCE (%) |       |
|----------|----------------|--------------|-----------------------------|----------------------------------------|--------|---------|-------|
|          |                |              |                             |                                        |        | average | best  |
| CF       | 0              | 0.7018       | 3.543                       | 3.601                                  | 32.01  | 0.760   | 0.773 |
| o-xylene | 0              | 0.3657       | 2.467                       | 2.544                                  | 27.88  | 0.252   | 0.287 |
| CB       | 0              | 0.6631       | 4.198                       | 4.215                                  | 29.51  | 0.821   | 0.838 |
| DCB      | 0              | 0.6891       | 5.474                       | 5.512                                  | 34.84  | 1.314   | 1.369 |
| DCB      | 3              | 0.6501       | 6.629                       | 6.683                                  | 41.22  | 1.776   | 1.792 |
| DCB      | 5              | 0.6292       | 7.026                       | 7.118                                  | 43.59  | 1.927   | 2.088 |
| DCB      | 7              | 0.6062       | 6.289                       | 6.311                                  | 41.23  | 1.572   | 1.625 |

**References:**

- [1] L. J. Huo, S. Q. Zhang, X. Guo, F. Xu, Y. F. Li, J. H. Hou, *Angew. Chem.-Int. Edit.* **2011**, *50*, 9697.
- [2] H. Bai, Y. Wang, P. Cheng, J. Wang, Y. Wu, J. Hou, X. Zhan, *J. Mater. Chem. A* **2015**, *3*, 1910.
- [3] M. Hösel, R. R. Søndergaard, M. Jørgensen, F. C. Krebs, *Energy Technology*, **2013**, *1*, 102.
- [4] H. F. Dam, F. C. Krebs, *Sol. Energy Mater. Sol. Cells*, **2012**, *97*, 191.
- [5] F. C. Krebs, M. Jørgensen, *Adv. Optical Mater.*, **2014**, *2*, 465.
